# Supplementary material for: Structure–property relationships on thiolate-protected gold nanoclusters
Source: Royal Society of Chemistry journal article supplement (doi:10.1039/c8na00246k), 2018-11-23
Supplement: c8na00246k1.pdf [file c8na00246k1.pdf]

## Supporting Information for “Structure-property Relationships on Thiolate-protected Gold Nanoclusters”

Michael J. Cowan and Giannis Mpourmpakis

Department of Chemical and Petroleum Engineering, University of Pittsburgh, Pittsburgh, PA 15261, USA

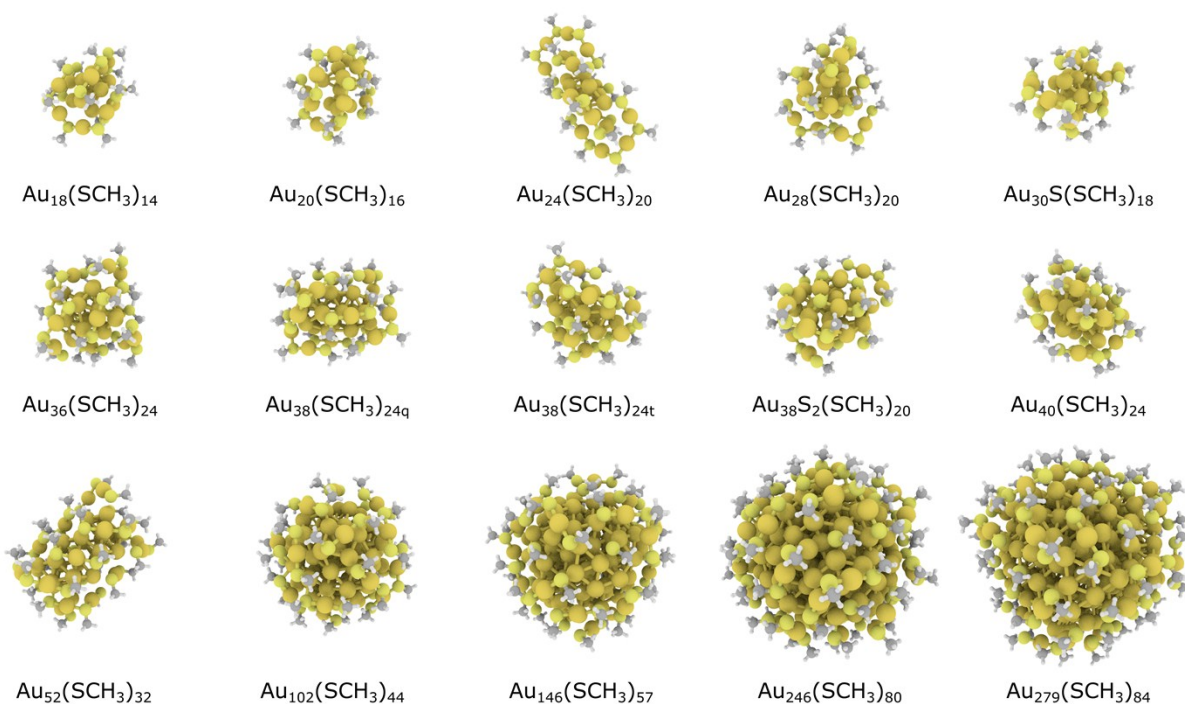

**Figure S1:** Fully optimized structures of Au NC ranging from  $\text{Au}_{18}(\text{SR})_{14}$  to  $\text{Au}_{279}(\text{SR})_{84}$ , where the R groups have been simulated with methyl ligands. White, gray, yellow, and gold correspond to hydrogen, carbon, sulfur, and gold atoms, respectively.
